# Supplementary material for: Synthesis of Composite-Color Fluorescent Carbon Dots for Simultaneous Accurate Quantitative Detection of Cu2+ and Fe3+
Source: Research Square preprint supplement (doi:10.21203/rs.3.rs-7583729/v1), 2025-09-22
Supplement: Supplementary file 1 [file cc712e001f36898967386f4e.docx]

| 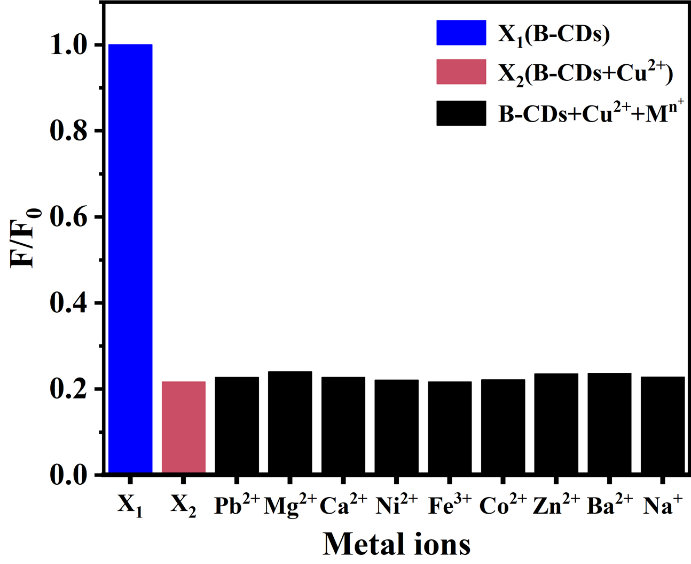 |
| --- |
| Fig.S1 Interference of other metal ions (M*n*+) on the detection of Cu2+ ions by B-CDs |

| 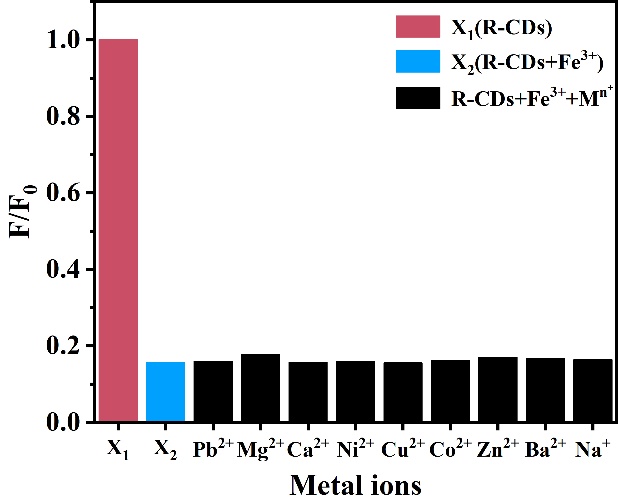 |
| --- |
| Fig.S2 Interference of other metal ions (M*n*+) on the detection of Fe3+ ions by R-CDs |

| 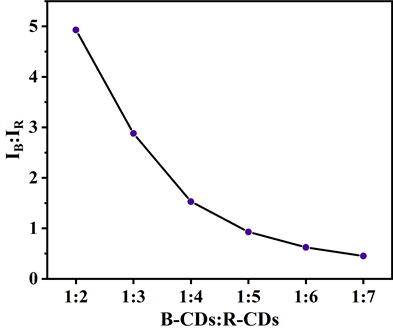 |
| --- |
| Fig.S3 Fluorescence intensity ratio of the dual emission peaks of B/R-CDs at different volume ratios of B-CDs and R-CDs |

| 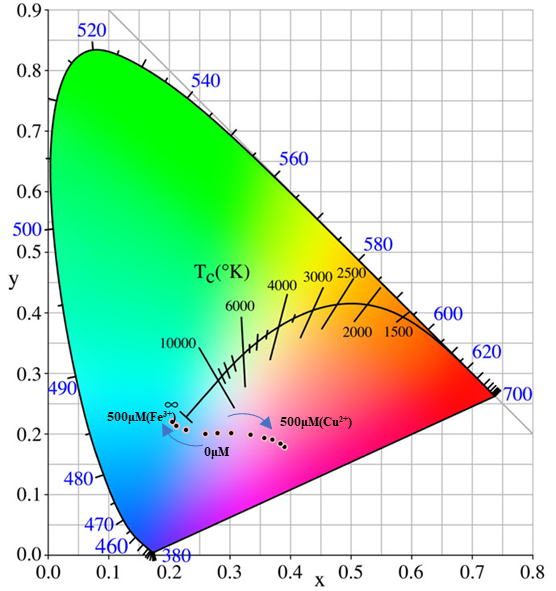 |
| --- |
| Fig.S4 CIE chromaticity diagrams of B/R-CDs in the presence of different concentrations of Cu²⁺ and Fe³⁺ |

| 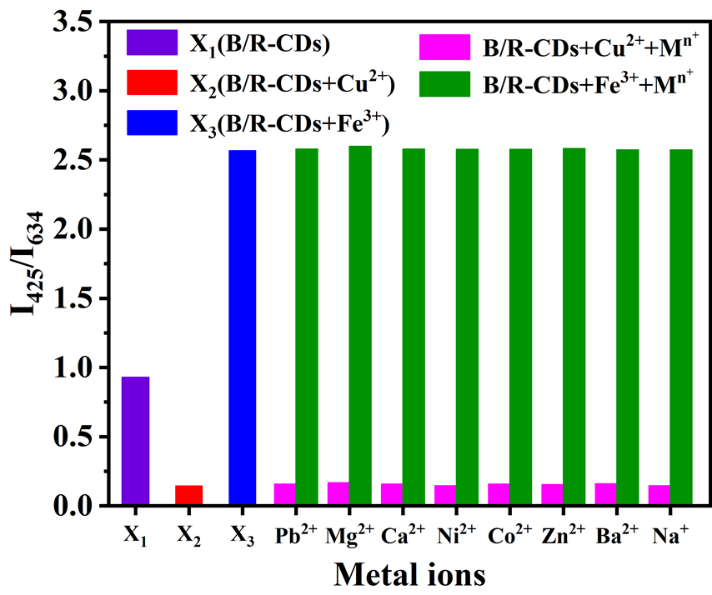 |
| --- |
| Fig.S5 Interference of other metal ions (M*n*+) on the detection by B/R-CDs |

| 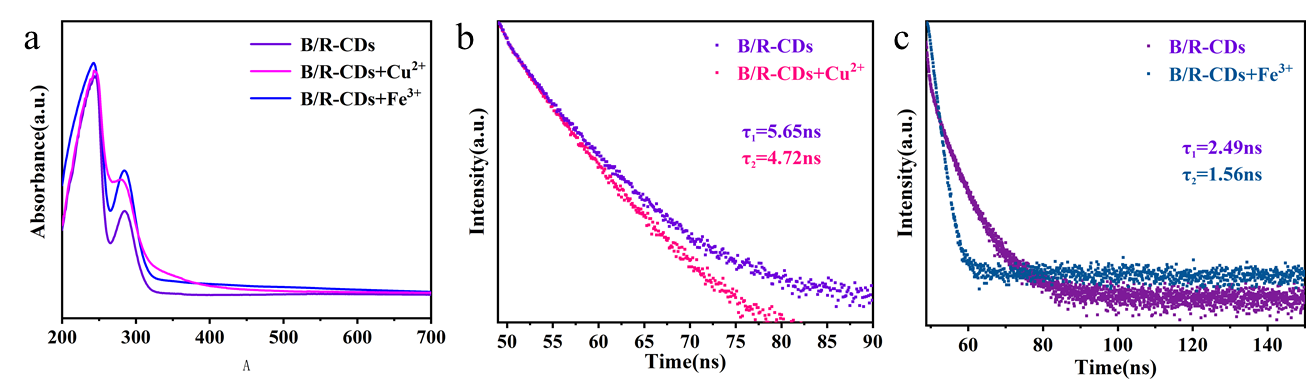 |
| --- |
| Fig.S6 PL spectra of B/R-CDs before and after adding Cu2+ and Fe3+ (a). Fluorescence lifetime decay profiles of B/R-CDs before and after adding Cu2+ (λem = 425 nm, b) and Fe3+ (λem = 634 nm, c) |
